# Supplementary material for: Differential gene expression during the moult cycle of Antarctic krill (Euphausia superba)
Source: BMC Genomics. 2010 Oct 19;11:582. doi: 10.1186/1471-2164-11-582 (PMC3091729; doi:10.1186/1471-2164-11-582)
Supplement: Additional file 1 — All transcripts differentially expressed more than twofold (p < 0.05) relative to C early in each moult cluster group. Each sheet in the file lists transcripts that were differentially expressed more than twofold (B&H adjusted p < 0.05) relative to C early for each moult cluster group. Each transcript is listed with GenBank accession number, contig/singleton identifier, top BLAST (E < 1e-5) description (tBLASTX hits are underlined, all others are BLASTX), E value of the BLAST hit, Gene Ontology identifiers (C = cellular component, F = molecular function, P = biological process), Pfam protein domain (E < 1e-5), fold change (with inverted fold change for down regulated transcripts) and false discovery rate adjusted p value. [file 1471-2164-11-582-S1.XLS]

## Sheet: Int1 up
Inter 1 up reg
Probe accession number [genbank]	Probe ID	Contig ID	Top BLAST description	E value	GOs	Fold change	t-test p-value
GW421546	Es_0051_06E04	CL230Contig1	---NA---			2.108	1.36e-06

## Sheet: Int1 down
Inter 1 down reg
Probe accession number [genbank]	Probe ID	Contig ID	Top BLAST description	E Value	GOs	Pfam protein domain	E value	Fold change	p-value
GW422044	Es_0600_04F03	CL110Contig1	---NA---					3.01205	6.9e-05
GW424049	Es_2001_06H04							4.62963	7.28e-10
GW424124	Es_2001_08C01							3.3557	2.11e-05
GW421748	Es_0051_09F12	CL124Contig1	XM_969006.2|PREDICTED: Tribolium castaneum similar to Cuticular protein 47Ef CG13214-PA (LOC662937), mRNA	1.32856e-14				4.329	1.15e-07
GW421893	Es_0600_02C01							4.31034	1.63e-06
GW421923	Es_0600_02F10							5.55556	0.000152
GW422453	Es_0701_01B08	CL129Contig1	---NA---					2.36407	4.26e-06
GW421351	Es_0051_03E07							3.48432	2.92e-07
GW422487	Es_0701_01F04	CL130Contig1	XP_001026582.1|hypothetical protein TTHERM_00332150 [Tetrahymena thermophila] >gi|89308349|gb|EAS06337.1| hypothetical protein TTHERM_00332150 [Tetrahymena thermophila SB210]	7.88876e-08	P:skeletal system development; C:cytoplasm; P:extracellular matrix organization; F:sugar binding; C:proteinaceous extracellular matrix; F:protein binding; C:nucleus			2.59067	0.000343
GW423108	Es_1401_01C08							3.62319	0.000219
GW423972	Es_2001_05E09							3.73134	0.000108
GW422029	Es_0600_04D01	CL153Contig1	---NA---					8.92857	6.06e-07
GW422212	Es_0600_07B02							9.43396	1.54e-09
GW422260	Es_0600_07G07							8.62069	3.11e-10
GW422096	Es_0600_05D08	CL167Contig1	ABU41097.1|putative cuticle protein [Lepeophtheirus salmonis]	5.85808e-19	F:structural constituent of cuticle			4.20168	4.2e-05
GW422159	Es_0600_06D01							3.81679	7.99e-05
GW424175	Es_2001_09A10							3.71747	0.000293
GW422114	Es_0600_05F07	CL183Contig1	---NA---					5.10204	5.59e-07
GW421621	Es_0051_07F12	CL188Contig1	AY752733.1|Callinectes sapidus arthrodial cuticle protein AMP8.1 mRNA, complete cds	7.19008e-20		Chitin_bind_4	1.3e-12	2.5974	5.03e-06
GW421867	Es_0600_01G10	CL209Contig1	---NA---					6.0241	5.82e-08
GW422297	Es_0600_08C09							7.0922	9.53e-10
GW421229	Es_0051_01F05	CL231Contig1	EF101994 | Portunus pelagicus cuticle protein CUT2 mRNA	1e-17				6.0241	3.04e-07
GW422245	Es_0600_07E10							6.28931	4.91e-05
GW421854	Es_0600_01F03	CL239Contig1	---NA---					3.96825	2.08e-05
GW422214	Es_0600_07B04							4.92611	0.000904
GW421836	Es_0600_01B08	CL264Contig1	---NA---					3.74532	4.33e-05
GW421935	Es_0600_02H06							4.06504	4.55e-08
GW422146	Es_0600_06B09							3.90625	4.42e-05
GW422248	Es_0600_07F02							4.06504	1.35e-05
GW422386	Es_0600_10B02	CL280Contig1	XP_001635560.1|predicted protein [Nematostella vectensis] >gi|156222655|gb|EDO43497.1| predicted protein [Nematostella vectensis]	4.41376e-12	P:blood vessel development; P:somitogenesis; P:notochord morphogenesis; C:cell part			3.003	5.06e-05
GW421724	Es_0051_09D03	CL28Contig1	---NA---					2.6455	1.52e-08
GW423867	Es_2001_03B11							3.22581	4.35e-07
GW422005	Es_0600_04A04	CL28Contig2	ABM54465.1|cuticle protein CB6 [Portunus pelagicus]	9.35023e-17	F:structural constituent of cuticle	Chitin_bind_4	1.1e-08	4.2735	2.77e-06
GW421702	Es_0051_09A06							9.80392	2e-05
GW421789	Es_0051_10D01							3.24675	8.05e-08
GW423973	Es_2001_05E10							2.07039	2.32e-06
GW421757	Es_0051_09G12							2.80899	0.000109
GW421784	Es_0051_10C07							4.29185	1e-06
GW421849	Es_0600_01D08							4.4843	1.95e-06
GW422074	Es_0600_05B04	CL302Contig1	BAF73806.1|calcification associated soluble matrix protein 2 [Procambarus clarkii]	2.49367e-20	F:structural molecule activity; F:structural constituent of cuticle			6.89655	2.03e-05
GW422080	Es_0600_05B10							5.98802	3.83e-06
GW422099	Es_0600_05D11	CL305Contig1	ABC26005.1|arthrodial cuticle protein AMP16.3 [Callinectes sapidus]	8.49551e-18	F:structural molecule activity; F:structural constituent of cuticle; C:extracellular region; F:transporter activity; P:transport			2.5	0.000541
GW422105	Es_0600_05E05	CL306Contig1	BAF73806.1|calcification associated soluble matrix protein 2 [Procambarus clarkii]	2.40581e-15	F:structural constituent of cuticle			7.0922	2.07e-06
GW422336	Es_0600_09A02							6.45161	7.67e-06
GW422868	Es_0701_07G12	CL30Contig1	---NA---					2.1978	6.53e-05
GW421643	Es_0051_08A06							2.49377	1.22e-05
GW421204	Es_0051_01C05							4.42478	0.000276
GW421827	Es_0600_01A08							6.89655	0.000429
GW421881	Es_0600_02A10							5.20833	0.00025
GW421962	Es_0600_03D08							4.92611	0.000364
GW421973	Es_0600_03F02							5.31915	0.000171
GW422322	Es_0600_08G06							5.98802	1.69e-05
GW422652	Es_0701_04F07							2.73973	4.65e-05
GW423519	Es_1401_07D11							2.88184	9.62e-05
GW421918	Es_0600_02E12	CL312Contig1	---NA---					3.41297	0.000201
GW422235	Es_0600_07D08	CL325Contig1	BAA90876.1|DD9B [Marsupenaeus japonicus]	7.44293e-10	F:structural constituent of cuticle			3.1348	0.00712
GW423769	Es_2001_01F07							2.7027	0.00554
GW422039	Es_0600_04E07	CL332Contig1	---NA---					3.5461	0.0147
GW422346	Es_0600_09C05							3.3557	0.0129
GW421398	Es_0051_04C03	CL336Contig1	BAC81566.1|calcification-associated peptide-1 [Procambarus clarkii]	3.68834e-13	F:structural constituent of cuticle			7.93651	4.46e-08
GW421288	Es_0051_02E08							6.09756	1.16e-07
GW422337	Es_0600_09A09	CL342Contig1	ABR27687.1|cuticle proprotein proCP5.2 [Callinectes sapidus]	2.9158e-26	F:structural molecule activity; F:structural constituent of cuticle	Cuticle_1	1.5e-14	5.20833	0.00019
GW423614	Es_1401_09A04							6.99301	0.000135
GW422691	Es_0701_05B08	CL343Contig1	---NA---					10.0503	0.000133
GW423301	Es_1401_04B06							7.40741	7.7e-05
GW421601	Es_0051_07D11	CL345Contig1	ACO12089.1|Cuticle protein 19 [Lepeophtheirus salmonis]	7.42721e-06				2.86533	2.12e-08
GW424145	Es_2001_08E08	CL347Contig1	BAA90876.1|DD9B [Marsupenaeus japonicus]	1.37277e-10	F:structural constituent of chitin-based cuticle; F:structural constituent of cuticle			4.03226	5.55e-06
GW422314	Es_0600_08F07							5.58659	4.05e-07
GW424227	Es_2001_10B02							3.63636	6.66e-07
GW422365	Es_0600_09F07							5.18135	7.47e-12
GW424168	Es_2001_08H08							4.44444	5.45e-06
GW422093	Es_0600_05D04	CL349Contig1	---NA---					3.04878	3.87e-07
GW422247	Es_0600_07F01							2.84091	3.67e-05
GW421640	Es_0051_07H11	CL74Contig1	---NA---					2.76243	0.000147
GW422313	Es_0600_08F04							7.14286	1.35e-07
GW422283	Es_0600_08B05	CL74Contig2	---NA---					3.44828	9.53e-06
GW422188	Es_0600_06G02	CL94Contig1	BAF73806.1|calcification associated soluble matrix protein 2 [Procambarus clarkii]	9.53205e-19	F:structural molecule activity; F:structural constituent of cuticle			3.44828	0.000401
GW422284	Es_0600_08B06							5.71429	1.22e-07
GW422294	Es_0600_08C06							5.78035	8.61e-07
GW421217	Es_0051_01D10	Singleton	---NA---					3.44828	1.5e-07
GW421274	Es_0051_02D02	Singleton	---NA---					2.93255	0.000335
GW421329	Es_0051_03B10	Singleton	---NA---					3.67647	4.35e-05
GW421335	Es_0051_03C07	Singleton	---NA---			Pfam-B_5239	3.3e-07	2.33645	0.000189
GW421348	Es_0051_03E02	Singleton	---NA---					2.77778	0.00428
GW421350	Es_0051_03E05	Singleton	---NA---					5.74713	0.000191
GW421360	Es_0051_03F09	Singleton	---NA---					2.08768	0.000554
GW421368	Es_0051_03G08	Singleton	---NA---					2.63158	0.000415
GW421389	Es_0051_04A10	Singleton	---NA---					5.78035	0.000145
GW421397	Es_0051_04B12	Singleton	---NA---					2.42131	5.74e-05
GW421430	Es_0051_04G10	Singleton	---NA---					2.331	2.33e-05
GW421443	Es_0051_05A05	Singleton	ABU41133.1|Sptzle 2-like protein [Lepeophtheirus salmonis]	3.73843e-15				4.7619	0.00138
GW421453	Es_0051_05B07	Singleton	---NA---					2.80112	2.83e-05
GW421464	Es_0051_05C09	Singleton	---NA---			Cuticle_1	2.4e-10	2.90698	1.84e-06
GW421482	Es_0051_05E08	Singleton	---NA---					4.09836	0.00231
GW421505	Es_0051_05H03	Singleton	---NA---					2.34192	0.0371
GW421533	Es_0051_06C05	Singleton	---NA---					2.71003	5.82e-05
GW421549	Es_0051_06E08	Singleton	NP_001161908.1|cuticular protein analogous to peritrophins 3-D1 [Tribolium castaneum] >gi|268309022|gb|ACY95477.1| cuticular protein analogous to peritrophins 3-D1 [Tribolium castaneum] >gi|270000884|gb|EEZ97331.1| hypothetical protein TcasGA2_TC011142 [Tribolium castaneum]	2.578e-14	F:chitin binding	CBM_14	1.4e-08	4.08163	0.000328
GW421562	Es_0051_06G04	Singleton	---NA---					2.01207	0.0111
GW421579	Es_0051_07A08	Singleton	---NA---					2.88184	0.0116
GW421611	Es_0051_07E11	Singleton	---NA---					2.86533	1.95e-05
GW421661	Es_0051_08C10	Singleton	---NA---					4.03226	6.23e-06
GW421667	Es_0051_08D07	Singleton	---NA---					2.63852	1.37e-05
GW421686	Es_0051_08G08	Singleton	---NA---					4.80769	0.00251
GW421690	Es_0051_08H01	Singleton	---NA---					2.19298	0.0168
GW421723	Es_0051_09D02	Singleton	---NA---					3.95257	0.000309
GW421824	Es_0600_01A02	Singleton	---NA---					6.53595	4.43e-06
GW421833	Es_0600_01B03	Singleton	---NA---					3.48432	1.16e-06
GW421835	Es_0600_01B06	Singleton	AAV28479.1|calcified cuticle protein CP8.2 [Callinectes sapidus]	1.02332e-06	F:structural constituent of cuticle			4.58716	0.000102
GW421845	Es_0600_01C12	Singleton	---NA---					3.84615	1.37e-08
GW421897	Es_0600_02C06	Singleton	---NA---					3.95257	4.84e-10
GW421912	Es_0600_02E01	Singleton	---NA---					3.5461	6.38e-05
GW421919	Es_0600_02F01	Singleton	---NA---					2.83286	0.0376
GW421925	Es_0600_02F12	Singleton	EFA00092.1|hypothetical protein TcasGA2_TC002907 [Tribolium castaneum]	8.22868e-13				2.73224	7.96e-05
GW421930	Es_0600_02G06	Singleton	BAA99543.1|BCS-1 [Balanus amphitrite]	1.47756e-17	F:structural constituent of cuticle	Chitin_bind_4	2.2e-10	4.56621	1.08e-06
GW421980	Es_0600_03F10	Singleton	---NA---					4	0.000256
GW421986	Es_0600_03G06	Singleton	---NA---					6.25	1.18e-05
GW421993	Es_0600_03H02	Singleton	---NA---					8.06452	1e-05
GW422002	Es_0600_03H12	Singleton	BAF73806.1|calcification associated soluble matrix protein 2 [Procambarus clarkii]	3.11965e-20	F:structural molecule activity; F:structural constituent of cuticle			3.83142	1.27e-08
GW422020	Es_0600_04C02	Singleton	---NA---					2.48756	0.0204
GW422045	Es_0600_04F04	Singleton	---NA---					2.77008	2.23e-06
GW422048	Es_0600_04F11	Singleton	---NA---					4.71698	9.11e-05
GW422066	Es_0600_04H11	Singleton	---NA---					2.42718	0.0258
GW422070	Es_0600_05A06	Singleton	ABB91676.1|calcified cuticle protein CP14.1 [Callinectes sapidus]	2.92669e-10	F:structural constituent of cuticle	Chitin_bind_4	1.3e-09	11.4025	3.6e-05
GW422072	Es_0600_05A08	Singleton	---NA---					5.40541	0.00905
GW422097	Es_0600_05D09	Singleton	---NA---					2.25225	0.000195
GW422101	Es_0600_05E01	Singleton	---NA---					4.40529	2.17e-08
GW422103	Es_0600_05E03	Singleton	BAA90876.1|DD9B [Marsupenaeus japonicus]	3.32642e-14	F:structural molecule activity; F:structural constituent of cuticle	Chitin_bind_4	8.7e-11	5.95238	7.96e-06
GW422124	Es_0600_05G12	Singleton	---NA---					7.5188	6.02e-07
GW422136	Es_0600_06A06	Singleton	ABB91677.1|arthrodial cuticle protein AMP16.5 [Callinectes sapidus]	3.4519e-08	F:structural constituent of cuticle			8.26446	3.16e-11
GW422168	Es_0600_06D12	Singleton	---NA---					2.58398	0.00697
GW422176	Es_0600_06F02	Singleton	BAF73806.1|calcification associated soluble matrix protein 2 [Procambarus clarkii]	5e-07				6.57895	6.75e-07
GW422180	Es_0600_06F06	Singleton	---NA---					3.25733	2.9e-05
GW422181	Es_0600_06F07	Singleton	ACU25385.1|crustin 4 [Panulirus japonicus]	5.23042e-07				3.5461	8.13e-05
GW422184	Es_0600_06F10	Singleton	---NA---					2.21239	0.00039
GW422192	Es_0600_06G10	Singleton	---NA---					2.30415	2.46e-05
GW422229	Es_0600_07D01	Singleton	P82119 | RecName: Full=Cuticle protein 6; AltName: Full=BcNCP14.9 [Blaberus craniifer]	3e-06	F:structural molecule activity; F:structural constituent of cuticle			2.95858	0.000201
GW422233	Es_0600_07D06	Singleton	AAV28476.1|arthrodial cuticle protein AMP8.1 [Callinectes sapidus]	1.01301e-10	F:structural molecule activity; F:structural constituent of cuticle			2.51889	9.22e-05
GW422234	Es_0600_07D07	Singleton	---NA---					4.85437	5.14e-05
GW422243	Es_0600_07E08	Singleton	---NA---					8.26446	1.91e-05
GW422249	Es_0600_07F04	Singleton	---NA---					3.98406	1.45e-05
GW422253	Es_0600_07F09	Singleton	---NA---					2.69542	0.0472
GW422257	Es_0600_07G04	Singleton	---NA---					2.74725	1.82e-10
GW422263	Es_0600_07G11	Singleton	---NA---					2.1097	0.00174
GW422281	Es_0600_08B02	Singleton	---NA---					2.25225	0.0115
GW422303	Es_0600_08D08	Singleton	ABU41034.1|hypothetical protein [Lepeophtheirus salmonis]	4.1302e-12				6.17284	1.47e-05
GW422304	Es_0600_08D11	Singleton	---NA---					5.64972	4.61e-07
GW422331	Es_0600_08H08	Singleton	BAA99543.1|BCS-1 [Balanus amphitrite]	4.25502e-17	F:structural constituent of cuticle	Chitin_bind_4	7.3e-09	3.0581	2.99e-06
GW422355	Es_0600_09D09	Singleton	---NA---					4.44444	8.34e-06
GW422357	Es_0600_09E03	Singleton	BAD16776.1|calcification-associated peptide-2 [Procambarus clarkii]	1.44891e-17	F:structural constituent of cuticle	Chitin_bind_4	2.5e-10	3.38983	8.93e-05
GW422360	Es_0600_09F01	Singleton	FAA00634 | TPA: putative cuticle protein [Bombyx mori]	7.17699e-09		Chitin_bind_4	4e-07	3.10559	1.45e-05
GW422371	Es_0600_09G08	Singleton	ABM54460.1|cuticle protein CUT9 [Portunus pelagicus]	3.90086e-07		Cuticle_1	1.9e-16	4	1.22e-05
GW422392	Es_0600_10B10	Singleton	---NA---					3.663	0.0115
GW422405	Es_0600_10D08	Singleton	---NA---					4.44444	3.74e-09
GW422412	Es_0600_10E05	Singleton	---NA---					2.34742	0.00415
GW422418	Es_0600_10F03	Singleton	AB021902.1|Balanus amphitrite bsc-1 mRNA, complete cds	2.86705e-08	F:structural constituent of cuticle	Chitin_bind_4	2.3e-06	3.663	3.98e-06
GW422422	Es_0600_10F11	Singleton	P81575.1|CUPA1_CANPGRecName: Full=Cuticle protein AM/CP1114; AltName: Full=CPAM/CPAM1114	1.34114e-07	F:structural molecule activity; F:structural constituent of cuticle			2.20751	1.67e-07
GW422426	Es_0600_10G05	Singleton	DQ847548.1|Cherax quadricarinatus clone epi1_B3 mRNA sequence	2.4282e-11				2.42718	8.1e-06
GW422429	Es_0600_10G11	Singleton	---NA---					6.06061	1.17e-06
GW422431	Es_0600_10H01	Singleton	---NA---					3.43643	0.000111
GW422570	Es_0701_03A06	Singleton	---NA---					4.80769	2.06e-06
GW422597	Es_0701_03E08	Singleton	---NA---					5.05051	0.000891
GW422624	Es_0701_04B04	Singleton	---NA---					2.51889	0.0119
GW422657	Es_0701_04G01	Singleton	---NA---					3.31126	0.00137
GW422680	Es_0701_05A06	Singleton	---NA---					12.3916	6.59e-05
GW422714	Es_0701_05E05	Singleton	XP_002591902.1|hypothetical protein BRAFLDRAFT_236983 [Branchiostoma floridae] >gi|229277115|gb|EEN47913.1| hypothetical protein BRAFLDRAFT_236983 [Branchiostoma floridae]	1.22432e-08				3.663	0.00059
GW422740	Es_0701_05H10	Singleton	---NA---					3.10559	7.53e-05
GW422742	Es_0701_05H12	Singleton	---NA---					4.56621	7.66e-05
GW422807	Es_0701_06H08	Singleton	---NA---					3.125	0.0392
GW422819	Es_0701_07A10	Singleton	XP_001947169.1|PREDICTED: similar to ectodermal CG6611-PA [Acyrthosiphon pisum]	2.9505e-10				6.57895	0.000377
GW422821	Es_0701_07B01	Singleton	---NA---					4.09836	4.07e-06
GW422831	Es_0701_07C02	Singleton	XP_001868236.1|cuticle protein [Culex quinquefasciatus] >gi|167862979|gb|EDS26362.1| cuticle protein [Culex quinquefasciatus]	1.57225e-11		Chitin_bind_4	2.2e-08	6.57895	1.2e-06
GW422841	Es_0701_07D10	Singleton	---NA---					2.52525	0.00115
GW422996	Es_0701_09G06	Singleton	---NA---					4.80769	3.96e-05
GW423366	Es_1401_05B04	Singleton	EDV91861.1| GH24606 [Drosophila grimshawi]	3.18175e-13	Chitin-bind 3 domain			2.08333	0.0232
GW423589	Es_1401_08F01	Singleton	---NA---					4.7619	0.00351
GW423630	Es_1401_09C11	Singleton	---NA---					8.19672	4.36e-05
GW423783	Es_2001_01G11	Singleton	ABB91676.1|calcified cuticle protein CP14.1 [Callinectes sapidus]	2.72725e-08	F:structural constituent of cuticle			5.02513	1.69e-05
GW423805	Es_2001_02B08	Singleton	---NA---					3.21543	9.32e-05
GW423821	Es_2001_02E03	Singleton	---NA---					2.14133	8.52e-05
GW423829	Es_2001_02F06	Singleton	XP_001942985.1|PREDICTED: similar to Collagen alpha-1(V) chain [Acyrthosiphon pisum]	3.52979e-25	F:chitin binding; C:extracellular region	CBM_14	2.1e-08	2.36407	4.58e-05
GW423882	Es_2001_03E03	Singleton	DQ288151.1|Callinectes sapidus calcified cuticle protein CP14.1 mRNA, complete cds	8.27834e-15				3.43643	1.53e-05
GW423888	Es_2001_03F08	Singleton	---NA---					4.23729	0.000193
GW423902	Es_2001_04A12	Singleton	AB021902.1|Balanus amphitrite bsc-1 mRNA, complete cds	2.15734e-19		Chitin_bind_4	2.1e-06	3.61011	1.51e-06
GW423963	Es_2001_05D07	Singleton	---NA---					2.331	2.46e-06
GW424109	Es_2001_07H11	Singleton	DQ288152.1|Callinectes sapidus arthrodial cuticle protein AMP16.5 mRNA, complete cds	2.06096e-12		Chitin_bind_4	2.6e-07	3.663	4.3e-07
GW424123	Es_2001_08B12	Singleton	---NA---					5	1.87e-11
GW424137	Es_2001_08D08	Singleton	---NA---					2.1322	2.79e-07
GW424176	Es_2001_09A11	Singleton	BAF73806.1|calcification associated soluble matrix protein 2 [Procambarus clarkii]	6.65689e-24	F:structural molecule activity; F:structural constituent of cuticle			6.36943	3.48e-07
GW424192	Es_2001_09C10	Singleton	XP_001868236.1|cuticle protein [Culex quinquefasciatus] >gi|167862979|gb|EDS26362.1| cuticle protein [Culex quinquefasciatus]	7.03641e-20				7.93651	2.28e-08
GW424204	Es_2001_09E12	Singleton	---NA---					2.079	2.32e-06
GW424207	Es_2001_09F10	Singleton	---NA---					6.09756	6.27e-08
GW424253	Es_2001_10E10	Singleton	---NA---					4.29185	1.54e-06

## Sheet: Int2 up
Inter 2 up reg
Probe accession number [genbank]	Probe ID	Contig ID	Top BLAST description	E value	GOs	Fold	p-value
GW422230	Es_0600_07D02	Singleton				2.553	0.0135
GW421759	Es_0051_09H03	Singleton				2.404	0.00763
GW422403	Es_0600_10D03	Singleton	GU168777 | Scylla serrata chitinase 2 (chit2)	7e-05		2.377	0.0188
GW423335	Es_1401_04F07	Singleton				2.377	0.044
GW423676	Es_1401_10A11	Singleton	XP_001198937 | PREDICTED: similar to endonuclease-reverse transcriptase [Strongylocentrotus purpuratus]	3.78909e-11	F:RNA binding; P:RNA-dependent DNA replication; F:RNA-directed DNA polymerase activity	2.222	0.0482
GW423501	Es_1401_07C03	Singleton				2.138	0.0219
GW423466	Es_1401_06F02	Singleton				2.104	0.0135
GW421676	Es_0051_08F03	Singleton	ACO15331 | Coatomer subunit epsilon [Caligus clemensi]	7e-12	F:protein transporter activity; P:protein complex assembly; P:retrograde vesicle-mediated transport, Golgi to ER; C:COPI vesicle coat; F:structural molecule activity; F:protein binding	2.025	0.0141
GW423815	Es_2001_02D02	Singleton				2.014	0.00693

## Sheet: Int2 down
Inter 2 down reg
Probe accession number [genbank]	Probe ID	Contig ID	Top BLAST description	E Value	GOs	Fold	Inverted fold change	p-value
GW424049	Es_2001_06H04	CL110Contig1	---NA---			0.348	2.87356	0.0159
GW424124	Es_2001_08C01					0.39	2.5641	0.000195
GW421351	Es_0051_03E07	CL129Contig1	---NA---			0.31	3.22581	0.0302
GW422453	Es_0701_01B08					0.36	2.77778	4.1e-05
GW422487	Es_0701_01F04	CL130Contig1	XP_001026582.1|hypothetical protein TTHERM_00332150 [Tetrahymena thermophila] >gi|89308349|gb|EAS06337.1| hypothetical protein TTHERM_00332150 [Tetrahymena thermophila SB210]	8.01535e-08	P:skeletal system development; P:extracellular matrix organization; C:cytoplasm; F:sugar binding; C:proteinaceous extracellular matrix; F:protein binding; C:nucleus	0.381	2.62467	0.00252
GW423108	Es_1401_01C08					0.296	3.37838	0.0074
GW423972	Es_2001_05E09					0.303	3.30033	0.00382
GW422029	Es_0600_04D01	CL153Contig1	---NA---			0.148	6.75676	6.17e-05
GW422212	Es_0600_07B02					0.128	7.8125	0.00278
GW422260	Es_0600_07G07					0.14	7.14286	0.00583
GW422114	Es_0600_05F07	CL183Contig1	---NA---			0.254	3.93701	0.000232
GW421621	Es_0051_07F12	CL188Contig1	AY752733.1|Callinectes sapidus arthrodial cuticle protein AMP8.1 mRNA, complete cds	7.21663e-20		0.399	2.50627	0.0391
GW421867	Es_0600_01G10	CL209Contig1	---NA---			0.255	3.92157	0.019
GW422297	Es_0600_08C09					0.219	4.56621	0.00578
GW421229	Es_0051_01F05	CL231Contig1	EF101994 | Portunus pelagicus cuticle protein CUT2 mRNA	1e-17		0.332	3.01205	0.0376
GW422245	Es_0600_07E10					0.245	4.08163	0.00858
GW421836	Es_0600_01B08	CL264Contig1	---NA---			0.371	2.69542	1.1e-06
GW421935	Es_0600_02H06					0.401	2.49377	0.000613
GW422146	Es_0600_06B09					0.396	2.52525	0.0248
GW422248	Es_0600_07F02					0.417	2.39808	0.000773
GW423821	Es_2001_02E03	CL28Contig1	---NA---			0.501	1.99601	0.00694
GW421757	Es_0051_09G12	CL28Contig2	ABM54465.1|cuticle protein CB6 [Portunus pelagicus]	9.39423e-17	F:structural constituent of cuticle	0.419	2.38663	0.00808
GW421784	Es_0051_10C07					0.306	3.26797	0.00335
GW421789	Es_0051_10D01					0.357	2.80112	0.0055
GW421849	Es_0600_01D08					0.307	3.25733	0.0175
GW422005	Es_0600_04A04					0.257	3.89105	0.0131
GW423973	Es_2001_05E10					0.476	2.10084	0.0195
GW422105	Es_0600_05E05	CL306Contig1	BAF73806.1|calcification associated soluble matrix protein 2 [Procambarus clarkii]	2.41713e-15	F:structural constituent of cuticle	0.188	5.31915	0.000658
GW422336	Es_0600_09A02					0.206	4.85437	0.00581
GW421204	Es_0051_01C05	CL30Contig1	---NA---			0.198	5.05051	0.000171
GW421827	Es_0600_01A08					0.117	8.54701	1.3e-05
GW421881	Es_0600_02A10					0.193	5.18135	0.00491
GW421962	Es_0600_03D08					0.229	4.36681	0.0117
GW421973	Es_0600_03F02					0.208	4.80769	0.00815
GW422322	Es_0600_08G06					0.17	5.88235	1.33e-05
GW422652	Es_0701_04F07					0.397	2.51889	0.0018
GW423519	Es_1401_07D11					0.368	2.71739	0.0149
GW421918	Es_0600_02E12	CL312Contig1	---NA---			0.424	2.35849	0.00893
GW422235	Es_0600_07D08	CL325Contig1	BAA90876.1|DD9B [Marsupenaeus japonicus]	7.47828e-10	F:structural constituent of cuticle	0.435	2.29885	4.06e-05
GW423769	Es_2001_01F07					0.386	2.59067	0.00538
GW421288	Es_0051_02E08	CL336Contig1	BAC81566.1|calcification-associated peptide-1 [Procambarus clarkii]	3.70576e-13	F:structural constituent of cuticle	0.242	4.13223	0.00293
GW421398	Es_0051_04C03					0.168	5.95238	0.000242
GW422337	Es_0600_09A09	CL342Contig1	ABR27687.1|cuticle proprotein proCP5.2 [Callinectes sapidus]	2.92967e-26	F:structural molecule activity; F:structural constituent of cuticle	0.276	3.62319	0.000407
GW423614	Es_1401_09A04					0.198	5.05051	0.000148
GW422691	Es_0701_05B08	CL343Contig1	---NA---			0.115	8.69565	0.000858
GW423301	Es_1401_04B06					0.201	4.97512	0.000351
GW421601	Es_0051_07D11	CL345Contig1	ACO12089.1|Cuticle protein 19 [Lepeophtheirus salmonis]	7.46192e-06		0.387	2.58398	0.000574
GW424145	Es_2001_08E08					0.296	3.37838	0.000149
GW422365	Es_0600_09F07	CL347Contig1	BAA90876.1|DD9B [Marsupenaeus japonicus]	1.37929e-10	F:structural constituent of chitin-based cuticle; F:structural constituent of cuticle	0.297	3.367	0.00243
GW424168	Es_2001_08H08					0.374	2.6738	0.0155
GW424227	Es_2001_10B02					0.398	2.51256	0.00873
GW421640	Es_0051_07H11	CL74Contig1	---NA---			0.433	2.30947	0.0285
GW422313	Es_0600_08F04					0.243	4.11523	0.0237
GW422283	Es_0600_08B05	CL74Contig2	---NA---			0.344	2.90698	0.000165
GW422188	Es_0600_06G02	CL94Contig1	BAF73806.1|calcification associated soluble matrix protein 2 [Procambarus clarkii]	9.57739e-19	F:structural molecule activity; F:structural constituent of cuticle	0.349	2.86533	0.0284
GW422284	Es_0600_08B06					0.243	4.11523	1.84e-05
GW422294	Es_0600_08C06					0.242	4.13223	0.000222
GW421274	Es_0051_02D02	Singleton	---NA---			0.491	2.03666	0.00547
GW421329	Es_0051_03B10	Singleton	---NA---			0.315	3.1746	0.00887
GW421348	Es_0051_03E02	Singleton	---NA---			0.462	2.1645	0.00632
GW421350	Es_0051_03E05	Singleton	---NA---			0.185	5.40541	0.0064
GW421368	Es_0051_03G08	Singleton	---NA---			0.424	2.35849	0.0174
GW421389	Es_0051_04A10	Singleton	ABB91676.1|calcified cuticle protein CP14.1 [Callinectes sapidus]	2e-05	F:structural constituent of cuticle	0.214	4.6729	1.98e-05
GW421562	Es_0051_06G04	Singleton	---NA---			0.466	2.14592	0.00327
GW421579	Es_0051_07A08	Singleton	---NA---			0.234	4.2735	0.000785
GW421611	Es_0051_07E11	Singleton	---NA---			0.471	2.12314	0.00104
GW421661	Es_0051_08C10	Singleton	---NA---			0.285	3.50877	0.00645
GW421686	Es_0051_08G08	Singleton	---NA---			0.222	4.5045	0.0188
GW421723	Es_0051_09D02	Singleton	---NA---			0.279	3.58423	0.0118
GW421824	Es_0600_01A02	Singleton	---NA---			0.174	5.74713	0.00172
GW421833	Es_0600_01B03	Singleton	---NA---			0.446	2.24215	0.00854
GW421897	Es_0600_02C06	Singleton	---NA---			0.26	3.84615	0.00106
GW421909	Es_0600_02D10	Singleton	---NA---			0.358	2.7933	0.0401
GW421912	Es_0600_02E01	Singleton	---NA---			0.301	3.32226	0.032
GW421919	Es_0600_02F01	Singleton	---NA---			0.165	6.06061	0.00204
GW421925	Es_0600_02F12	Singleton	EFA00092.1|hypothetical protein TcasGA2_TC002907 [Tribolium castaneum]	8.26767e-13		0.417	2.39808	0.0316
GW421930	Es_0600_02G06	Singleton	BAA99543.1|BCS-1 [Balanus amphitrite]	1.43515e-17	F:structural constituent of cuticle	0.415	2.40964	0.0263
GW421980	Es_0600_03F10	Singleton	---NA---			0.366	2.73224	0.0459
GW421986	Es_0600_03G06	Singleton	---NA---			0.196	5.10204	0.00678
GW421993	Es_0600_03H02	Singleton	---NA---			0.136	7.35294	0.00247
GW422045	Es_0600_04F04	Singleton	---NA---			0.433	2.30947	0.000627
GW422048	Es_0600_04F11	Singleton	---NA---			0.25	4	0.018
GW422097	Es_0600_05D09	Singleton	---NA---			0.442	2.26244	0.00104
GW422103	Es_0600_05E03	Singleton	BAA90876.1|DD9B [Marsupenaeus japonicus]	3.3421e-14	F:structural molecule activity; F:structural constituent of cuticle	0.242	4.13223	0.000155
GW422124	Es_0600_05G12	Singleton	---NA---			0.207	4.83092	1.89e-05
GW422136	Es_0600_06A06	Singleton	ABB91677.1|arthrodial cuticle protein AMP16.5 [Callinectes sapidus]	3.46827e-08	F:structural constituent of cuticle	0.169	5.91716	0.00753
GW422180	Es_0600_06F06	Singleton	---NA---			0.289	3.46021	0.000249
GW422181	Es_0600_06F07	Singleton	ACU25385.1|crustin 4 [Panulirus japonicus]	5.25523e-07		0.31	3.22581	0.000413
GW422229	Es_0600_07D01	Singleton	P82119 | RecName: Full=Cuticle protein 6; AltName: Full=BcNCP14.9 [Blaberus craniifer]	3e-06	F:structural molecule activity; F:structural constituent of cuticle	0.412	2.42718	0.0209
GW422234	Es_0600_07D07	Singleton	---NA---			0.413	2.42131	0.001
GW422243	Es_0600_07E08	Singleton	---NA---			0.141	7.0922	1.3e-07
GW422249	Es_0600_07F04	Singleton	---NA---			0.408	2.45098	0.0169
GW422281	Es_0600_08B02	Singleton	---NA---			0.382	2.6178	0.00922
GW422303	Es_0600_08D08	Singleton	ABU41034.1|hypothetical protein [Lepeophtheirus salmonis]	4.14968e-12		0.192	5.20833	0.0124
GW422304	Es_0600_08D11	Singleton	---NA---			0.295	3.38983	0.0146
GW422314	Es_0600_08F07	Singleton	---NA---			0.278	3.59712	9.94e-05
GW422355	Es_0600_09D09	Singleton	---NA---			0.238	4.20168	1.21e-05
GW422371	Es_0600_09G08	Singleton	ABM54460.1|cuticle protein CUT9 [Portunus pelagicus]	3.91916e-07		0.417	2.39808	0.0398
GW422418	Es_0600_10F03	Singleton	AB021902.1|Balanus amphitrite bsc-1 mRNA, complete cds	2.87777e-08	F:structural constituent of cuticle	0.35	2.85714	0.000969
GW422429	Es_0600_10G11	Singleton	---NA---			0.288	3.47222	0.00333
GW422431	Es_0600_10H01	Singleton	---NA---			0.364	2.74725	0.0402
GW422570	Es_0701_03A06	Singleton	---NA---			0.322	3.10559	0.00135
GW422624	Es_0701_04B04	Singleton	---NA---			0.315	3.1746	0.0165
GW422657	Es_0701_04G01	Singleton	---NA---			0.384	2.60417	0.0256
GW422714	Es_0701_05E05	Singleton	XP_002591902.1|hypothetical protein BRAFLDRAFT_236983 [Branchiostoma floridae] >gi|229277115|gb|EEN47913.1| hypothetical protein BRAFLDRAFT_236983 [Branchiostoma floridae]	1.23009e-08		0.294	3.40136	0.0159
GW422742	Es_0701_05H12	Singleton	---NA---			0.332	3.01205	0.000816
GW422821	Es_0701_07B01	Singleton	---NA---			0.291	3.43643	0.00717
GW422831	Es_0701_07C02	Singleton	XP_001868236.1|cuticle protein [Culex quinquefasciatus] >gi|167862979|gb|EDS26362.1| cuticle protein [Culex quinquefasciatus]	1.57968e-11		0.221	4.52489	0.00118
GW422867	Es_0701_07G11	Singleton	---NA---			0.268	3.73134	0.00968
GW422887	Es_0701_08B03	Singleton	---NA---			0.441	2.26757	0.0232
GW422996	Es_0701_09G06	Singleton	---NA---			0.295	3.38983	0.0041
GW423589	Es_1401_08F01	Singleton	---NA---			0.164	6.09756	2.45e-05
GW423630	Es_1401_09C11	Singleton	---NA---			0.18	5.55556	0.00329
GW423783	Es_2001_01G11	Singleton	ABB91676.1|calcified cuticle protein CP14.1 [Callinectes sapidus]	2.74015e-08	F:structural constituent of cuticle	0.315	3.1746	0.00785
GW423867	Es_2001_03B11	Singleton	AB021902.1|Balanus amphitrite bsc-1 mRNA, complete cds	2.16541e-19		0.322	3.10559	0.000472
GW423902	Es_2001_04A12	Singleton	---NA---			0.425	2.35294	0.0465
GW424123	Es_2001_08B12	Singleton	---NA---			0.247	4.04858	0.00261
GW424176	Es_2001_09A11	Singleton	BAF73806.1|calcification associated soluble matrix protein 2 [Procambarus clarkii]	6.50259e-24	F:structural molecule activity; F:structural constituent of cuticle	0.191	5.2356	0.00195
GW424192	Es_2001_09C10	Singleton	XP_001868236.1|cuticle protein [Culex quinquefasciatus] >gi|167862979|gb|EDS26362.1| cuticle protein [Culex quinquefasciatus]	7.06978e-20		0.171	5.84795	1.29e-06
GW424207	Es_2001_09F10	Singleton	---NA---			0.208	4.80769	0.000891
GW424253	Es_2001_10E10	Singleton	---NA---			0.259	3.861	2.67e-05

## Sheet: Int3 up
Inter 3 up reg
Probe accession number [genbank]	Probe ID	Contig ID	Top BLAST description	E value	GOs	Pfam protein domain	E value	Fold change	p-value
GW421482	Es_0051_05E08	Singleton	---NA---					3.704	0.0128
GW422819	Es_0701_07A10	Singleton	XP_001947169.1|PREDICTED: similar to ectodermal CG6611-PA [Acyrthosiphon pisum]	2.9505e-10				3.585	0.00502
GW421505	Es_0051_05H03	Singleton	---NA---					3.329	0.000216
GW422597	Es_0701_03E08	Singleton	---NA---					3.294	0.0163
GW422392	Es_0600_10B10	Singleton	---NA---					3.074	0.00212
GW421759	Es_0051_09H03	Singleton	---NA---					3.069	0.00964
GW421388	Es_0051_04A07	Singleton	---NA---					2.879	0.00438
GW421796	Es_0051_10D12	Singleton	XP_002428550.1|RNA-binding protein 8A, putative [Pediculus humanus corporis] >gi|212513184|gb|EEB15812.1| RNA-binding protein 8A, putative [Pediculus humanus corporis]	2.5323e-14	C:cytoplasm; P:RNA splicing; F:mRNA binding; C:spliceosome; F:protein binding; P:nuclear-transcribed mRNA catabolic process, nonsense-mediated decay; P:mRNA transport; P:mRNA processing; F:nucleotide binding			2.79	0.000193
GW423366	Es_1401_05B04	Singleton	XP_001992154.1|GH24606 [Drosophila grimshawi] >gi|193892995|gb|EDV91861.1| GH24606 [Drosophila grimshawi]	3.18175e-13				2.771	0.0027
GW422168	Es_0600_06D12	Singleton	---NA---					2.52	0.000462
GW422380	Es_0600_10A06	Singleton	---NA---					2.178	0.000551
GW424063	Es_2001_07B05	Singleton	---NA---					2.117	0.00325
GW422403	Es_0600_10D03	Singleton	---NA---					2.077	0.0112
GW423710	Es_1401_10F03	Singleton	XP_002429039 | translation elongation factor, putative [Pediculus humanus corporis]	3.50869e-27		GTP_EFU	4.3e-23	2.071	0.00356
GW421725	Es_0051_09D04	Singleton	---NA---					2.03	0.0348

## Sheet: Int3 down
Inter 3 down reg
Probe accession number [genbank]	Probe ID	Contig ID	Top BLAST description	E-Value	GOs	Pfam protein domain	E value	Fold change	Inverted fold change	p-value
GW421741	Es_0051_09F04	CL103Contig1	---NA---					0.366	2.73224	0.0463
GW421239	Es_0051_01G06	CL126Contig1	---NA---					0.295	3.38983	0.0295
GW422287	Es_0600_08B10							0.348	2.87356	0.0159
GW422726	Es_0701_05F10							0.199	5.02513	0.0179
GW421351	Es_0051_03E07	CL129Contig1	---NA---					0.288	3.47222	0.00036
GW422453	Es_0701_01B08							0.391	2.55754	0.0104
GW423108	Es_1401_01C08	CL130Contig1	XP_001026582.1|hypothetical protein TTHERM_00332150 [Tetrahymena thermophila] >gi|89308349|gb|EAS06337.1| hypothetical protein TTHERM_00332150 [Tetrahymena thermophila SB210]	7.99025e-08	P:skeletal system development; P:extracellular matrix organization; C:cytoplasm; F:sugar binding; C:proteinaceous extracellular matrix; F:protein binding; C:nucleus			0.292	3.42466	0.0258
GW423972	Es_2001_05E09							0.267	3.74532	0.0366
GW422029	Es_0600_04D01	CL153Contig1	---NA---					0.154	6.49351	0.0132
GW422212	Es_0600_07B02							0.148	6.75676	0.000146
GW422260	Es_0600_07G07							0.124	8.06452	0.00442
GW421621	Es_0051_07F12	CL188Contig1	AY752733.1|Callinectes sapidus arthrodial cuticle protein AMP8.1 mRNA, complete cds	7.21591e-20		Chitin_bind_4	1.3e-12	0.362	2.76243	0.0271
GW421867	Es_0600_01G10	CL209Contig1	---NA---					0.266	3.7594	0.0173
GW422297	Es_0600_08C09							0.332	3.01205	0.00611
GW421724	Es_0051_09D03	CL28Contig1	---NA---					0.387	2.58398	0.0305
GW423867	Es_2001_03B11							0.364	2.74725	0.000111
GW421757	Es_0051_09G12	CL28Contig2	ABM54465.1|cuticle protein CB6 [Portunus pelagicus]	9.36593e-17	F:structural constituent of cuticle	Chitin_bind_4	1.1e-08	0.339	2.94985	0.0137
GW421784	Es_0051_10C07							0.25	4	0.0162
GW421789	Es_0051_10D01							0.281	3.55872	0.00637
GW421849	Es_0600_01D08							0.275	3.63636	0.0284
GW422005	Es_0600_04A04							0.262	3.81679	0.0118
GW423973	Es_2001_05E10							0.441	2.26757	0.0155
GW424006	Es_2001_06A07	CL299Contig1	BAD16776.1|calcification-associated peptide-2 [Procambarus clarkii]	6.58948e-10	F:structural constituent of cuticle	Chitin_bind_4	3e-11	0.408	2.45098	2.52e-05
GW421803	Es_0051_10E11	CL300Contig1	XP_001601772.1|PREDICTED: similar to beta-N-acetylglucosaminidase [Nasonia vitripennis]	1.15073e-11				0.308	3.24675	0.0211
GW423947	Es_2001_05A09							0.275	3.63636	0.0091
GW422105	Es_0600_05E05	CL306Contig1	BAF73806.1|calcification associated soluble matrix protein 2 [Procambarus clarkii]	2.40986e-15	F:structural constituent of cuticle			0.305	3.27869	0.0398
GW422336	Es_0600_09A02							0.338	2.95858	0.0361
GW421204	Es_0051_01C05	CL30Contig1	---NA---					0.202	4.9505	0.0174
GW421827	Es_0600_01A08							0.135	7.40741	0.000221
GW421881	Es_0600_02A10							0.221	4.52489	0.009
GW421962	Es_0600_03D08							0.199	5.02513	0.0218
GW421973	Es_0600_03F02							0.174	5.74713	0.0286
GW422322	Es_0600_08G06							0.159	6.28931	0.0107
GW422652	Es_0701_04F07							0.327	3.0581	0.0229
GW422868	Es_0701_07G12							0.439	2.2779	0.0345
GW423519	Es_1401_07D11							0.357	2.80112	0.0208
GW421918	Es_0600_02E12	CL312Contig1	---NA---					0.359	2.78552	0.0348
GW421288	Es_0051_02E08	CL336Contig1	BAC81566.1|calcification-associated peptide-1 [Procambarus clarkii]	3.69446e-13	F:structural constituent of cuticle			0.209	4.78469	0.0408
GW421398	Es_0051_04C03							0.181	5.52486	0.0175
GW422337	Es_0600_09A09	CL342Contig1	ABR27687.1|cuticle proprotein proCP5.2 [Callinectes sapidus]	2.9205e-26	F:structural molecule activity; F:structural constituent of cuticle	Cuticle_1	1.5e-14	0.406	2.46305	0.048
GW423614	Es_1401_09A04							0.268	3.73134	0.0214
GW422691	Es_0701_05B08	CL343Contig1	---NA---					0.182	5.49451	0.0165
GW423301	Es_1401_04B06							0.202	4.9505	0.0229
GW421601	Es_0051_07D11	CL345Contig1	ACO12089.1|Cuticle protein 19 [Lepeophtheirus salmonis]	7.44001e-06				0.396	2.52525	0.002
GW424145	Es_2001_08E08							0.288	3.47222	0.00789
GW421640	Es_0051_07H11	CL74Contig1	---NA---					0.331	3.02115	0.00201
GW422313	Es_0600_08F04							0.16	6.25	0.00339
GW422283	Es_0600_08B05	CL74Contig2	---NA---					0.388	2.57732	4.97e-05
GW421329	Es_0051_03B10	Singleton	---NA---					0.304	3.28947	0.00119
GW421350	Es_0051_03E05	Singleton	---NA---					0.184	5.43478	0.0372
GW421453	Es_0051_05B07	Singleton	---NA---					0.46	2.17391	0.00279
GW421562	Es_0051_06G04	Singleton	---NA---					0.323	3.09598	0.0166
GW421579	Es_0051_07A08	Singleton	---NA---					0.27	3.7037	0.000479
GW421589	Es_0051_07C05	Singleton	---NA---					0.479	2.08768	0.0475
GW421661	Es_0051_08C10	Singleton	---NA---					0.391	2.55754	0.0107
GW421686	Es_0051_08G08	Singleton	---NA---					0.13	7.69231	0.00911
GW421690	Es_0051_08H01	Singleton	---NA---					0.247	4.04858	0.0164
GW421723	Es_0051_09D02	Singleton	---NA---					0.228	4.38596	0.00305
GW421824	Es_0600_01A02	Singleton	---NA---					0.227	4.40529	0.0078
GW421832	Es_0600_01B02	Singleton	---NA---					0.485	2.06186	1.08e-05
GW421897	Es_0600_02C06	Singleton	---NA---					0.264	3.78788	0.00901
GW421912	Es_0600_02E01	Singleton	---NA---					0.294	3.40136	0.0198
GW421919	Es_0600_02F01	Singleton	---NA---					0.166	6.0241	0.0177
GW421980	Es_0600_03F10	Singleton	---NA---					0.317	3.15457	0.0289
GW421986	Es_0600_03G06	Singleton	---NA---					0.174	5.74713	0.0243
GW421993	Es_0600_03H02	Singleton	---NA---					0.198	5.05051	0.0073
GW422011	Es_0600_04B02	Singleton	---NA---					0.337	2.96736	0.00166
GW422045	Es_0600_04F04	Singleton	---NA---					0.464	2.15517	0.0145
GW422048	Es_0600_04F11	Singleton	---NA---					0.285	3.50877	0.0343
GW422103	Es_0600_05E03	Singleton	BAA90876.1|DD9B [Marsupenaeus japonicus]	3.33197e-14	F:structural molecule activity; F:structural constituent of cuticle	Chitin_bind_4	8.7e-11	0.371	2.69542	0.00209
GW422136	Es_0600_06A06	Singleton	ABB91677.1|arthrodial cuticle protein AMP16.5 [Callinectes sapidus]	3.45753e-08	F:structural constituent of cuticle			0.458	2.18341	0.0063
GW422180	Es_0600_06F06	Singleton	---NA---					0.269	3.71747	0.0216
GW422181	Es_0600_06F07	Singleton	ACU25385.1|crustin 4 [Panulirus japonicus]	5.23895e-07				0.285	3.50877	0.00125
GW422243	Es_0600_07E08	Singleton	---NA---					0.169	5.91716	0.0134
GW422257	Es_0600_07G04	Singleton	---NA---					0.444	2.25225	0.0303
GW422303	Es_0600_08D08	Singleton	ABU41034.1|hypothetical protein [Lepeophtheirus salmonis]	4.13707e-12				0.157	6.36943	0.0102
GW422355	Es_0600_09D09	Singleton	---NA---					0.283	3.53357	0.0334
GW422412	Es_0600_10E05	Singleton	---NA---					0.448	2.23214	0.00305
GW422418	Es_0600_10F03	Singleton	AB021902.1|Balanus amphitrite bsc-1 mRNA, complete cds	2.87748e-08	F:structural constituent of cuticle	Chitin_bind_4	2.3e-06	0.304	3.28947	0.0471
GW422535	Es_0701_02D07	Singleton	---NA---					0.302	3.31126	0.049
GW422569	Es_0701_03A05	Singleton	---NA---					0.386	2.59067	0.00637
GW422821	Es_0701_07B01	Singleton	---NA---					0.287	3.48432	0.048
GW422867	Es_0701_07G11	Singleton	---NA---					0.206	4.85437	0.00743
GW422887	Es_0701_08B03	Singleton	---NA---					0.358	2.7933	0.017
GW423589	Es_1401_08F01	Singleton	---NA---					0.127	7.87402	0.00323
GW423821	Es_2001_02E03	Singleton	---NA---					0.396	2.52525	0.00465
GW424123	Es_2001_08B12	Singleton	---NA---					0.232	4.31034	0.0101
GW424176	Es_2001_09A11	Singleton	BAF73806.1|calcification associated soluble matrix protein 2 [Procambarus clarkii]	6.48235e-24	F:structural molecule activity; F:structural constituent of cuticle			0.38	2.63158	0.00258
GW424253	Es_2001_10E10	Singleton	---NA---					0.215	4.65116	3.27e-06

## Sheet: Int4 up
Inter 4 up reg
Probe accession number [genbank]	Probe ID	Contig ID	Top BLAST description	E Value	GOs	Pfam protein domain	E Value	Fold	p-value
GW421741	Es_0051_09F04	CL103Contig1	---NA---					2.183	0.0014
GW421239	Es_0051_01G06	CL126Contig1	---NA---					2.398	0.00113
GW421803	Es_0051_10E11	CL300Contig1	XP_001601772.1|PREDICTED: similar to beta-N-acetylglucosaminidase [Nasonia vitripennis]	1.15073e-11				2.234	0.000372
GW421454	Es_0051_05B08	Es_0051_05B08	---NA---					2.225	0.00184
GW421562	Es_0051_06G04	Es_0051_06G04	---NA---					2.321	0.0311
GW421711	Es_0051_09B11	Es_0051_09B11	---NA---					2.126	0.000229
GW421839	Es_0600_01C03	Es_0600_01C03	AAD25400.1|AF122900_1extracellular superoxide dismutase precursor [Pacifastacus leniusculus]	8.66267e-10	F:metal ion binding; F:oxidoreductase activity; F:copper ion binding; P:superoxide metabolic process; F:zinc ion binding; F:antioxidant activity; F:superoxide dismutase activity; C:extracellular region			2.697	0.000163
GW421919	Es_0600_02F01	Es_0600_02F01	---NA---					2.055	0.0649
GW421959	Es_0600_03D01	Es_0600_03D01	---NA---					2.94	0.00344
GW422057	Es_0600_04G09	Es_0600_04G09	---NA---					2.287	0.000491
GW422535	Es_0701_02D07	Es_0701_02D07	---NA---					2.425	0.00217

## Sheet: Int4 down
Inter 4 down reg
Probe accession number [genbank]	Probe ID	Contig ID	Top BLAST description	E Value	GOs	Pfam protein domain	E Value	Fold	Inverted fold change	p-value
GW422044	Es_0600_04F03	CL110Contig1	---NA---					0.314	3.18471	1.38e-06
GW424049	Es_2001_06H04							0.204	4.90196	1.47e-05
GW424124	Es_2001_08C01							0.259	3.861	6.46e-07
GW421748	Es_0051_09F12	CL124Contig1	XM_969006.2|PREDICTED: Tribolium castaneum similar to Cuticular protein 47Ef CG13214-PA (LOC662937), mRNA	1.33343e-14				0.288	3.47222	0.000113
GW421893	Es_0600_02C01							0.272	3.67647	0.000149
GW421923	Es_0600_02F10							0.276	3.62319	0.00751
GW422029	Es_0600_04D01	CL153Contig1	---NA---					0.172	5.81395	2.87e-05
GW422212	Es_0600_07B02							0.131	7.63359	2.54e-05
GW422260	Es_0600_07G07							0.145	6.89655	1.31e-06
GW422096	Es_0600_05D08	CL167Contig1	ABU41097.1|putative cuticle protein [Lepeophtheirus salmonis]	5.8857e-19	F:structural constituent of cuticle			0.348	2.87356	0.0023
GW422159	Es_0600_06D01							0.465	2.15054	0.0154
GW424175	Es_2001_09A10							0.341	2.93255	0.00537
GW422114	Es_0600_05F07	CL183Contig1	---NA---					0.25	4	2.17e-07
GW421867	Es_0600_01G10	CL209Contig1	---NA---					0.315	3.1746	0.0112
GW422297	Es_0600_08C09							0.312	3.20513	0.0107
GW421854	Es_0600_01F03	CL239Contig1	---NA---					0.202	4.9505	1.09e-05
GW422214	Es_0600_07B04							0.167	5.98802	1.39e-05
GW421836	Es_0600_01B08	CL264Contig1	---NA---					0.307	3.25733	0.00011
GW421935	Es_0600_02H06							0.335	2.98507	7e-06
GW422146	Es_0600_06B09							0.332	3.01205	0.0011
GW422248	Es_0600_07F02							0.33	3.0303	1.2e-05
GW421724	Es_0051_09D03	CL28Contig1	---NA---					0.459	2.17865	0.00109
GW423867	Es_2001_03B11							0.335	2.98507	1.85e-07
GW421757	Es_0051_09G12	CL28Contig2	ABM54465.1|cuticle protein CB6 [Portunus pelagicus]	9.39423e-17	F:structural constituent of cuticle	Chitin_bind_4	1.1e-08	0.362	2.76243	2.24e-05
GW421784	Es_0051_10C07							0.298	3.3557	7.4e-05
GW421789	Es_0051_10D01							0.338	2.95858	4.21e-06
GW421849	Es_0600_01D08							0.29	3.44828	6.29e-06
GW422005	Es_0600_04A04							0.296	3.37838	2.14e-06
GW423973	Es_2001_05E10							0.442	2.26244	2.17e-05
GW422074	Es_0600_05B04	CL302Contig1	BAF73806.1|calcification associated soluble matrix protein 2 [Procambarus clarkii]	2.50552e-20	F:structural molecule activity; F:structural constituent of cuticle			0.171	5.84795	1.94e-08
GW422080	Es_0600_05B10							0.177	5.64972	1.34e-05
GW422093	Es_0600_05D04							0.427	2.34192	3.39e-06
GW422247	Es_0600_07F01							0.413	2.42131	7.39e-05
GW422099	Es_0600_05D11	CL305Contig1	ABC26005.1|arthrodial cuticle protein AMP16.3 [Callinectes sapidus]	8.53569e-18	F:structural molecule activity; F:structural constituent of cuticle; C:extracellular region; F:transporter activity; P:transport			0.423	2.36407	9.39e-05
GW422105	Es_0600_05E05	CL306Contig1	BAF73806.1|calcification associated soluble matrix protein 2 [Procambarus clarkii]	2.41713e-15	F:structural constituent of cuticle			0.189	5.29101	4.76e-07
GW422336	Es_0600_09A02							0.183	5.46448	2.35e-07
GW422235	Es_0600_07D08	CL325Contig1	BAA90876.1|DD9B [Marsupenaeus japonicus]	7.47828e-10	F:structural constituent of cuticle			0.473	2.11416	0.000906
GW422039	Es_0600_04E07	CL332Contig1	---NA---					0.247	4.04858	0.000233
GW422346	Es_0600_09C05							0.256	3.90625	0.000112
GW421288	Es_0051_02E08	CL336Contig1	BAC81566.1|calcification-associated peptide-1 [Procambarus clarkii]	3.70576e-13	F:structural constituent of cuticle			0.201	4.97512	9.21e-07
GW421398	Es_0051_04C03							0.152	6.57895	6.12e-06
GW421601	Es_0051_07D11	CL345Contig1	ACO12089.1|Cuticle protein 19 [Lepeophtheirus salmonis]	7.46192e-06				0.443	2.25734	3.15e-05
GW424145	Es_2001_08E08							0.273	3.663	2.39e-07
GW422314	Es_0600_08F07	CL347Contig1	BAA90876.1|DD9B [Marsupenaeus japonicus]	1.37929e-10	F:structural constituent of chitin-based cuticle; F:structural constituent of cuticle			0.302	3.31126	5.74e-07
GW422365	Es_0600_09F07							0.277	3.61011	0.000169
GW424168	Es_2001_08H08							0.266	3.7594	9.19e-07
GW424227	Es_2001_10B02							0.297	3.367	5.34e-06
GW421640	Es_0051_07H11	CL74Contig1	---NA---					0.419	2.38663	2.21e-06
GW422313	Es_0600_08F04							0.225	4.44444	3.16e-06
GW422283	Es_0600_08B05	CL74Contig2	---NA---					0.35	2.85714	1.06e-07
GW422188	Es_0600_06G02	CL94Contig1	BAF73806.1|calcification associated soluble matrix protein 2 [Procambarus clarkii]	9.57739e-19	F:structural molecule activity; F:structural constituent of cuticle			0.322	3.10559	0.000195
GW422284	Es_0600_08B06							0.225	4.44444	2.98e-07
GW422294	Es_0600_08C06							0.194	5.15464	8.5e-06
GW421274	Es_0051_02D02	Singleton	---NA---					0.405	2.46914	0.00371
GW421329	Es_0051_03B10	Singleton	---NA---					0.299	3.34448	1.58e-05
GW421389	Es_0051_04A10	Singleton	ABB91676.1|calcified cuticle protein CP14.1 [Callinectes sapidus]	2e-05	F:structural constituent of cuticle			0.186	5.37634	7.17e-05
GW421430	Es_0051_04G10	Singleton	---NA---					0.48	2.08333	0.000316
GW421443	Es_0051_05A05	Singleton	ABU41133.1|Sptzle 2-like protein [Lepeophtheirus salmonis]	3.75619e-15				0.455	2.1978	0.00967
GW421482	Es_0051_05E08	Singleton	---NA---					0.198	5.05051	9.96e-06
GW421505	Es_0051_05H03	Singleton	---NA---					0.181	5.52486	1.03e-07
GW421533	Es_0051_06C05	Singleton	---NA---					0.432	2.31481	9.66e-06
GW421549	Es_0051_06E08	Singleton	NP_001161908.1|cuticular protein analogous to peritrophins 3-D1 [Tribolium castaneum] >gi|268309022|gb|ACY95477.1| cuticular protein analogous to peritrophins 3-D1 [Tribolium castaneum] >gi|270000884|gb|EEZ97331.1| hypothetical protein TcasGA2_TC011142 [Tribolium castaneum]	2.59023e-14	F:chitin binding	CBM_14	1.4e-08	0.378	2.6455	0.00214
GW421611	Es_0051_07E11	Singleton	---NA---					0.436	2.29358	0.00081
GW421661	Es_0051_08C10	Singleton	---NA---					0.305	3.27869	0.000171
GW421667	Es_0051_08D07	Singleton	---NA---					0.399	2.50627	0.00188
GW421759	Es_0051_09H03	Singleton	---NA---					0.486	2.05761	0.00104
GW421824	Es_0600_01A02	Singleton	---NA---					0.167	5.98802	4.89e-08
GW421833	Es_0600_01B03	Singleton	---NA---					0.366	2.73224	0.000232
GW421835	Es_0600_01B06	Singleton	AAV28479.1|calcified cuticle protein CP8.2 [Callinectes sapidus]	1.0281e-06	F:structural constituent of cuticle			0.227	4.40529	1.68e-05
GW421845	Es_0600_01C12	Singleton	---NA---					0.337	2.96736	2.14e-06
GW421912	Es_0600_02E01	Singleton	---NA---					0.449	2.22717	3.1e-05
GW421930	Es_0600_02G06	Singleton	BAA99543.1|BCS-1 [Balanus amphitrite]	1.43515e-17	F:structural constituent of cuticle	Chitin_bind_4	2.2e-10	0.285	3.50877	1.5e-08
GW422002	Es_0600_03H12	Singleton	BAF73806.1|calcification associated soluble matrix protein 2 [Procambarus clarkii]	3.13443e-20	F:structural molecule activity; F:structural constituent of cuticle			0.309	3.23625	8.13e-07
GW422048	Es_0600_04F11	Singleton	---NA---					0.401	2.49377	0.00121
GW422066	Es_0600_04H11	Singleton	---NA---					0.335	2.98507	0.0154
GW422070	Es_0600_05A06	Singleton	DQ288151.1|Callinectes sapidus calcified cuticle protein CP14.1 mRNA, complete cds	5.19667e-20	F:structural constituent of cuticle	Chitin_bind_4	1.3e-09	0.0887	11.274	1.21e-09
GW422072	Es_0600_05A08	Singleton	---NA---					0.233	4.29185	0.0405
GW422101	Es_0600_05E01	Singleton	---NA---					0.291	3.43643	0.0102
GW422103	Es_0600_05E03	Singleton	BAA90876.1|DD9B [Marsupenaeus japonicus]	3.3421e-14	F:structural molecule activity; F:structural constituent of cuticle	Chitin_bind_4	8.7e-11	0.256	3.90625	3.83e-05
GW422124	Es_0600_05G12	Singleton	---NA---					0.219	4.56621	0.000506
GW422136	Es_0600_06A06	Singleton	ABB91677.1|arthrodial cuticle protein AMP16.5 [Callinectes sapidus]	3.46827e-08	F:structural constituent of cuticle			0.167	5.98802	6.71e-09
GW422168	Es_0600_06D12	Singleton	---NA---					0.243	4.11523	0.000305
GW422176	Es_0600_06F02	Singleton	BAF73806.1|calcification associated soluble matrix protein 2 [Procambarus clarkii]	5e-07				0.181	5.52486	1.22e-06
GW422181	Es_0600_06F07	Singleton	ACU25385.1|crustin 4 [Panulirus japonicus]	5.25523e-07				0.342	2.92398	0.00011
GW422234	Es_0600_07D07	Singleton	---NA---					0.238	4.20168	0.00301
GW422243	Es_0600_07E08	Singleton	---NA---					0.161	6.21118	2.04e-05
GW422253	Es_0600_07F09	Singleton	---NA---					0.294	3.40136	0.00186
GW422257	Es_0600_07G04	Singleton	---NA---					0.492	2.03252	0.011
GW422270	Es_0600_07H08	Singleton	---NA---					0.186	5.37634	0.00056
GW422278	Es_0600_08A10	Singleton	ACR23316.1|beta-N-acetylglucosaminidase [Litopenaeus vannamei]	4.58851e-40	F:beta-N-acetylhexosaminidase activity; P:chitin catabolic process	Glyco_hydro_20	1.9e-12	0.262	3.81679	0.00431
GW422304	Es_0600_08D11	Singleton	---NA---					0.189	5.29101	4.83e-06
GW422331	Es_0600_08H08	Singleton	BAA99543.1|BCS-1 [Balanus amphitrite]	4.275e-17	F:structural constituent of cuticle	Chitin_bind_4	7.3e-09	0.455	2.1978	0.00194
GW422355	Es_0600_09D09	Singleton	---NA---					0.302	3.31126	0.000324
GW422357	Es_0600_09E03	Singleton	BAD16776.1|calcification-associated peptide-2 [Procambarus clarkii]	1.45573e-17	F:structural constituent of cuticle	Chitin_bind_4	2.5e-10	0.426	2.34742	0.00329
GW422360	Es_0600_09F01	Singleton	XP_001961118.1|GF13710 [Drosophila ananassae] >gi|190622416|gb|EDV37940.1| GF13710 [Drosophila ananassae]	7.2104e-09		Chitin_bind_4	4e-07	0.354	2.82486	0.00479
GW422392	Es_0600_10B10	Singleton	---NA---					0.288	3.47222	0.0254
GW422405	Es_0600_10D08	Singleton	---NA---					0.317	3.15457	4.51e-07
GW422418	Es_0600_10F03	Singleton	ABN13583.1|putative cuticle protein [Artemia franciscana]	2.35415e-07	F:structural constituent of cuticle	Chitin_bind_4	2.3e-06	0.335	2.98507	3.11e-05
GW422426	Es_0600_10G05	Singleton	DQ847548.1|Cherax quadricarinatus clone epi1_B3 mRNA sequence	2.43717e-11				0.473	2.11416	0.0343
GW422429	Es_0600_10G11	Singleton	---NA---					0.263	3.80228	0.000485
GW422431	Es_0600_10H01	Singleton	---NA---					0.474	2.1097	0.0217
GW422570	Es_0701_03A06	Singleton	---NA---					0.273	3.663	1.84e-06
GW422597	Es_0701_03E08	Singleton	---NA---					0.158	6.32911	0.000446
GW422680	Es_0701_05A06	Singleton	---NA---					0.082	12.1951	1.48e-07
GW422807	Es_0701_06H08	Singleton	---NA---					0.257	3.89105	0.0142
GW422819	Es_0701_07A10	Singleton	XP_001947169.1|PREDICTED: similar to ectodermal CG6611-PA [Acyrthosiphon pisum]	2.9644e-10				0.124	8.06452	5.07e-07
GW422831	Es_0701_07C02	Singleton	XP_001868236.1|cuticle protein [Culex quinquefasciatus] >gi|167862979|gb|EDS26362.1| cuticle protein [Culex quinquefasciatus]	1.57968e-11		Chitin_bind_4	2.2e-08	0.199	5.02513	0.000257
GW423366	Es_1401_05B04	Singleton	XP_001992154.1|GH24606 [Drosophila grimshawi] >gi|193892995|gb|EDV91861.1| GH24606 [Drosophila grimshawi]	3.19676e-13				0.236	4.23729	4.11e-07
GW423630	Es_1401_09C11	Singleton	---NA---					0.188	5.31915	1.3e-05
GW423783	Es_2001_01G11	Singleton	ABB91676.1|calcified cuticle protein CP14.1 [Callinectes sapidus]	2.74015e-08	F:structural constituent of cuticle			0.18	5.55556	5.51e-06
GW423805	Es_2001_02B08	Singleton	---NA---					0.305	3.27869	3.24e-09
GW423821	Es_2001_02E03	Singleton	---NA---					0.392	2.55102	0.000285
GW423829	Es_2001_02F06	Singleton	XP_001942985.1|PREDICTED: similar to Collagen alpha-1(V) chain [Acyrthosiphon pisum]	3.44797e-25	F:chitin binding; C:extracellular region	CBM_14	2.1e-08	0.367	2.7248	0.00137
GW423882	Es_2001_03E03	Singleton	DQ288151.1|Callinectes sapidus calcified cuticle protein CP14.1 mRNA, complete cds	8.30929e-15				0.274	3.64964	8.7e-06
GW423902	Es_2001_04A12	Singleton	AB021902.1|Balanus amphitrite bsc-1 mRNA, complete cds	2.16541e-19		Chitin_bind_4	2.1e-06	0.354	2.82486	0.000125
GW423963	Es_2001_05D07	Singleton	---NA---					0.419	2.38663	1.58e-07
GW424109	Es_2001_07H11	Singleton	DQ288152.1|Callinectes sapidus arthrodial cuticle protein AMP16.5 mRNA, complete cds	2.06862e-12		Chitin_bind_4	2.6e-07	0.285	3.50877	1.61e-07
GW424123	Es_2001_08B12	Singleton	---NA---					0.221	4.52489	1.33e-07
GW424176	Es_2001_09A11	Singleton	BAF73806.1|calcification associated soluble matrix protein 2 [Procambarus clarkii]	6.50259e-24	F:structural molecule activity; F:structural constituent of cuticle			0.162	6.17284	1.33e-06
GW424192	Es_2001_09C10	Singleton	XP_001868236.1|cuticle protein [Culex quinquefasciatus] >gi|167862979|gb|EDS26362.1| cuticle protein [Culex quinquefasciatus]	7.06978e-20				0.161	6.21118	0.00031
GW424207	Es_2001_09F10	Singleton	---NA---					0.18	5.55556	2.13e-11
GW424253	Es_2001_10E10	Singleton	---NA---					0.354	2.82486	0.0042

## Sheet: D0a up
D0 a up reg
Probe accession number [genbank]	Probe ID	Contig ID	Top BLAST description	E Value	GOs	Pfam protein domain	E value	Fold	p-value
GW422044	Es_0600_04F03	CL110Contig1	---NA---					2.923	0.00054
GW424049	Es_2001_06H04							2.202	0.0165
GW422608	Es_0701_03G09	CL18Contig1	---NA---					3.064	0.00208
GW421854	Es_0600_01F03	CL239Contig1	---NA---					2.55	0.0202
GW422372	Es_0600_09G12	CL298Contig1	---NA---					2.226	0.0375
GW423005	Es_0701_09H04							2.334	0.0301
GW421850	Es_0600_01E02	CL305Contig1	ABC26005.1|arthrodial cuticle protein AMP16.3 [Callinectes sapidus]	8.53712e-18	F:structural molecule activity; F:structural constituent of cuticle; C:extracellular region; F:transporter activity; P:transport			2.784	0.00956
GW421335	Es_0051_03C07	Singleton	---NA---					2.658	0.0334
GW421348	Es_0051_03E02	Singleton	---NA---					2.7	0.0173
GW421422	Es_0051_04F11	Singleton	Q04831.1|GLNA_PANARRecName: Full=Glutamine synthetase; AltName: Full=Glutamate--ammonia ligase >gi|160786|gb|AAA02583.1| glutamine synthetase [Panulirus argus]	9.95567e-19	P:glutamine biosynthetic process; C:cytoplasm; F:glutamate-ammonia ligase activity	Gln-synt_C	1.1e-09	3.052	0.015
GW421505	Es_0051_05H03	Singleton	---NA---					3.27	0.033
GW421533	Es_0051_06C05	Singleton	---NA---					2.947	0.00761
GW421549	Es_0051_06E08	Singleton	NP_001161908.1|cuticular protein analogous to peritrophins 3-D1 [Tribolium castaneum] >gi|268309022|gb|ACY95477.1| cuticular protein analogous to peritrophins 3-D1 [Tribolium castaneum] >gi|270000884|gb|EEZ97331.1| hypothetical protein TcasGA2_TC011142 [Tribolium castaneum]	2.59065e-14	F:chitin binding	CBM_14	1.4e-08	3.06	0.0309
GW421667	Es_0051_08D07	Singleton	---NA---					3.188	0.000603
GW421796	Es_0051_10D12	Singleton	XP_002428550.1|RNA-binding protein 8A, putative [Pediculus humanus corporis] >gi|212513184|gb|EEB15812.1| RNA-binding protein 8A, putative [Pediculus humanus corporis]	2.54463e-14	C:cytoplasm; P:RNA splicing; F:mRNA binding; C:spliceosome; F:protein binding; P:nuclear-transcribed mRNA catabolic process, nonsense-mediated decay; P:mRNA transport; P:mRNA processing; F:nucleotide binding			2.247	0.029
GW421835	Es_0600_01B06	Singleton	AAV28479.1|calcified cuticle protein CP8.2 [Callinectes sapidus]	1.0281e-06	F:structural constituent of cuticle			3.611	5.72e-05
GW421912	Es_0600_02E01	Singleton	---NA---					2.75	0.0232
GW421930	Es_0600_02G06	Singleton	BAA99543.1|BCS-1 [Balanus amphitrite]	1.4354e-17	F:structural constituent of cuticle	Chitin_bind_4	2.2e-10	2.108	0.0394
GW422002	Es_0600_03H12	Singleton	BAF73806.1|calcification associated soluble matrix protein 2 [Procambarus clarkii]	3.13495e-20	F:structural molecule activity; F:structural constituent of cuticle			2.58	0.0496
GW422048	Es_0600_04F11	Singleton	---NA---					2.917	0.000219
GW422070	Es_0600_05A06	Singleton	ABB91676 | calcified cuticle protein CP14.1 [Callinectes sapidus	2.94055e-10	F:structural constituent of cuticle	Chitin_bind_4	1.3e-09	3.178	0.0384
GW422101	Es_0600_05E01	Singleton	---NA---					3.135	0.012
GW422119	Es_0600_05G06	Singleton	XP_002416386.1|mannosyltransferase 1, putative [Ixodes scapularis] >gi|215510600|gb|EEC20053.1| mannosyltransferase 1, putative [Ixodes scapularis]	1.66857e-53	P:protein amino acid dephosphorylation; F:protein phosphatase type 2A regulator activity; P:Wnt receptor signaling pathway; P:imaginal disc pattern formation; C:integral to membrane; P:sensory organ development; P:regulation of mitosis; P:protein amino acid O-linked mannosylation; F:protein serine/threonine phosphatase activity; P:embryonic development via the syncytial blastoderm; P:mitotic anap…	MIR	1.1e-08	2.884	0.0237
GW422176	Es_0600_06F02	Singleton	BAF73806.1|calcification associated soluble matrix protein 2 [Procambarus clarkii]	5e-07				5.674	0.0411
GW422304	Es_0600_08D11	Singleton	---NA---					3.56	0.0363
GW422362	Es_0600_09F03	Singleton	---NA---					2.318	0.00909
GW422570	Es_0701_03A06	Singleton	---NA---					4.68	0.00948
GW422597	Es_0701_03E08	Singleton	---NA---					12.58	0.0057
GW422717	Es_0701_05E10	Singleton	---NA---					2.378	0.0181
GW422819	Es_0701_07A10	Singleton	XP_001947169.1|PREDICTED: similar to ectodermal CG6611-PA [Acyrthosiphon pisum]	2.9649e-10				3.155	0.024
GW422931	Es_0701_08G08	Singleton	---NA---					2.568	0.00303
GW423203	Es_1401_02F08	Singleton	---NA---					2.172	0.0161
GW423710	Es_1401_10F03	Singleton	XP_002429039 | translation elongation factor, putative [Pediculus humanus corporis]	3.40857e-27		GTP_EFTU	4.3e-23	2.332	0.00154
GW423882	Es_2001_03E03	Singleton	---NA---					3.222	0.0467
GW423902	Es_2001_04A12	Singleton	AB021902.1|Balanus amphitrite bsc-1 mRNA, complete cds	2.16628e-19		Chitin_bind_4	2.1e-06	2.099	0.0083
GW424109	Es_2001_07H11	Singleton	DQ288152.1|Callinectes sapidus arthrodial cuticle protein AMP16.5 mRNA, complete cds	2.06862e-12		Chitin_bind_4	2.6e-07	3.311	0.00524
GW424204	Es_2001_09E12	Singleton	---NA---					2.588	0.00012
GW424207	Es_2001_09F10	Singleton	---NA---					3.042	0.0452

## Sheet: D0a down
D0 a down reg
Probe accession number [genbank]	Probe ID	Contig ID	Top BLAST description	E Value	GOs	Pfam protein domain	E value	Fold	Inverted fold	t-test p-value
GW421691	Es_0051_08H02	CL103Contig1	---NA---					0.387	2.58398	0.00504
GW421741	Es_0051_09F04							0.344	2.90698	0.00151
GW421216	Es_0051_01D09	CL11Contig1	EFA04035.1|hypothetical protein TcasGA2_TC014264 [Tribolium castaneum]	2.80267e-16				0.28	3.57143	0.0213
GW421597	Es_0051_07D06							0.356	2.80899	0.0144
GW421609	Es_0051_07E09							0.368	2.71739	0.0296
GW421760	Es_0051_09H05							0.351	2.849	0.0228
GW422007	Es_0600_04A08							0.231	4.329	0.0312
GW422577	Es_0701_03B04	CL11Contig2	---NA---					0.375	2.66667	0.0146
GW421772	Es_0051_10A11							0.387	2.58398	0.0396
GW423742	Es_2001_01A10	CL11Contig3	---NA---					0.274	3.64964	0.00432
GW422473	Es_0701_01D07	CL11Contig4	EFA04035.1|hypothetical protein TcasGA2_TC014264 [Tribolium castaneum]	1.42459e-14				0.334	2.99401	0.0457
GW422850	Es_0701_07F01							0.364	2.74725	0.0497
GW424194	Es_2001_09D02							0.342	2.92398	0.0459
GW421239	Es_0051_01G06	CL126Contig1	---NA---					0.238	4.20168	0.0146
GW422287	Es_0600_08B10							0.299	3.34448	0.00109
GW422726	Es_0701_05F10							0.181	5.52486	0.0137
GW421351	Es_0051_03E07	CL129Contig1	---NA---					0.232	4.31034	0.00196
GW422453	Es_0701_01B08							0.348	2.87356	1.32e-05
GW422487	Es_0701_01F04	CL130Contig1	XP_001026582.1|hypothetical protein TTHERM_00332150 [Tetrahymena thermophila] >gi|89308349|gb|EAS06337.1| hypothetical protein TTHERM_00332150 [Tetrahymena thermophila SB210]	8.01664e-08	P:extracellular matrix organization; P:skeletal system development; C:cytoplasm; F:sugar binding; C:proteinaceous extracellular matrix; F:protein binding; C:nucleus			0.355	2.8169	0.0438
GW423108	Es_1401_01C08							0.277	3.61011	0.00431
GW423972	Es_2001_05E09							0.229	4.36681	0.00552
GW421660	Es_0051_08C09	CL16Contig1	XM_002432882.1|Pediculus humanus corporis hypothetical protein, mRNA	1.19387e-09				0.35	2.85714	0.00484
GW421524	Es_0051_06B05	CL16Contig2	---NA---					0.394	2.53807	0.0462
GW421882	Es_0600_02A11	CL16Contig3	---NA---					0.298	3.3557	0.0344
GW421795	Es_0051_10D11	CL269Contig1	---NA---					0.454	2.20264	0.00423
GW421724	Es_0051_09D03	CL28Contig1	---NA---					0.441	2.26757	0.00751
GW423867	Es_2001_03B11							0.359	2.78552	0.0015
GW422005	Es_0600_04A04	CL28Contig2	ABM54465.1|cuticle protein CB6 [Portunus pelagicus]	9.39585e-17	F:structural constituent of cuticle	Chitin_bind_4	1.1e-08	0.26	3.84615	0.00775
GW421702	Es_0051_09A06							0.135	7.40741	0.000236
GW421789	Es_0051_10D01							0.309	3.23625	0.0206
GW423973	Es_2001_05E10							0.43	2.32558	0.000392
GW421757	Es_0051_09G12							0.347	2.88184	0.00135
GW421784	Es_0051_10C07							0.272	3.67647	0.0217
GW421849	Es_0600_01D08							0.31	3.22581	0.00948
GW421803	Es_0051_10E11	CL300Contig1	XP_001601772.1|PREDICTED: similar to beta-N-acetylglucosaminidase [Nasonia vitripennis]	1.15453e-11				0.196	5.10204	0.0143
GW423947	Es_2001_05A09							0.199	5.02513	0.00352
GW421204	Es_0051_01C05	CL30Contig1	---NA---					0.254	3.93701	0.0297
GW421643	Es_0051_08A06							0.466	2.14592	0.0184
GW421827	Es_0600_01A08							0.167	5.98802	0.0301
GW421881	Es_0600_02A10							0.223	4.4843	0.0182
GW421962	Es_0600_03D08							0.232	4.31034	0.0497
GW421973	Es_0600_03F02							0.208	4.80769	0.044
GW422322	Es_0600_08G06							0.188	5.31915	0.0255
GW422652	Es_0701_04F07							0.394	2.53807	0.0308
GW422868	Es_0701_07G12							0.458	2.18341	0.0402
GW423519	Es_1401_07D11							0.375	2.66667	0.0173
GW423301	Es_1401_04B06	CL343Contig1	---NA---					0.347	2.88184	0.0431
GW421296	Es_0051_02F05	CL40Contig1	XP_001601772.1|PREDICTED: similar to beta-N-acetylglucosaminidase [Nasonia vitripennis]	1.84535e-20	F:beta-N-acetylhexosaminidase activity; P:chitin catabolic process			0.299	3.34448	0.0296
GW421848	Es_0600_01D06							0.418	2.39234	0.00103
GW421309	Es_0051_02G11							0.4	2.5	0.00162
GW421567	Es_0051_06G12							0.394	2.53807	0.00908
GW421598	Es_0051_07D07							0.356	2.80899	0.0239
GW421968	Es_0600_03E05							0.324	3.08642	0.0181
GW423474	Es_1401_06G01							0.241	4.14938	0.0211
GW423728	Es_1401_10H04	CL84Contig1	ACT78699.1|delta glutathione S-transferase GST [Eriocheir sinensis]	2.78685e-32	F:transferase activity			0.488	2.04918	0.0412
GW421237	Es_0051_01G03	Singleton	---NA---					0.493	2.0284	0.0039
GW421261	Es_0051_02B05	Singleton	---NA---					0.478	2.09205	0.000899
GW421268	Es_0051_02C04	Singleton	EFA04035.1|hypothetical protein TcasGA2_TC014264 [Tribolium castaneum]	7.13642e-12				0.239	4.1841	0.0211
GW421329	Es_0051_03B10	Singleton	---NA---					0.325	3.07692	0.00183
GW421350	Es_0051_03E05	Singleton	---NA---					0.171	5.84795	0.0171
GW421430	Es_0051_04G10	Singleton	---NA---					0.402	2.48756	0.0016
GW421562	Es_0051_06G04	Singleton	---NA---					0.334	2.99401	0.000124
GW421579	Es_0051_07A08	Singleton	---NA---					0.278	3.59712	0.022
GW421686	Es_0051_08G08	Singleton	---NA---					0.144	6.94444	0.00712
GW421690	Es_0051_08H01	Singleton	---NA---					0.18	5.55556	0.000338
GW421695	Es_0051_08H07	Singleton	---NA---					0.447	2.23714	0.00233
GW421711	Es_0051_09B11	Singleton	---NA---					0.191	5.2356	0.0116
GW421723	Es_0051_09D02	Singleton	---NA---					0.179	5.58659	0.000695
GW421832	Es_0600_01B02	Singleton	---NA---					0.468	2.13675	0.00105
GW421919	Es_0600_02F01	Singleton	---NA---					0.234	4.2735	0.0118
GW421986	Es_0600_03G06	Singleton	---NA---					0.164	6.09756	0.0166
GW422011	Es_0600_04B02	Singleton	---NA---					0.338	2.95858	0.0119
GW422170	Es_0600_06E04	Singleton	XM_001601722 | Nasonia vitripennis similar to beta-N-acetylglucosaminidase (LOC100117578)	2e-10	F:beta-N-acetylhexosaminidase activity			0.285	3.50877	0.0209
GW422281	Es_0600_08B02	Singleton	---NA---					0.322	3.10559	0.0293
GW422340	Es_0600_09B05	Singleton	---NA---					0.404	2.47525	0.000503
GW422418	Es_0600_10F03	Singleton	ABN13583.1|putative cuticle protein [Artemia franciscana]	2e-07	F:structural constituent of cuticle	Chitin_bind_4	2.3e-06	0.386	2.59067	0.00226
GW422535	Es_0701_02D07	Singleton	---NA---					0.263	3.80228	0.0178
GW422714	Es_0701_05E05	Singleton	XP_002591902.1|hypothetical protein BRAFLDRAFT_236983 [Branchiostoma floridae] >gi|229277115|gb|EEN47913.1| hypothetical protein BRAFLDRAFT_236983 [Branchiostoma floridae]	1.2303e-08				0.238	4.20168	0.00848
GW422841	Es_0701_07D10	Singleton	---NA---					0.424	2.35849	0.0416
GW422867	Es_0701_07G11	Singleton	---NA---					0.217	4.60829	0.00868
GW422887	Es_0701_08B03	Singleton	---NA---					0.344	2.90698	0.0051
GW423097	Es_1401_01B07	Singleton	---NA---					0.298	3.3557	0.000802
GW423382	Es_1401_05D04	Singleton	---NA---					0.371	2.69542	0.000952
GW423589	Es_1401_08F01	Singleton	---NA---					0.133	7.5188	0.00528
GW423753	Es_2001_01C08	Singleton	---NA---					0.432	2.31481	0.000596
GW423821	Es_2001_02E03	Singleton	---NA---					0.428	2.33645	0.0012
GW424145	Es_2001_08E08	Singleton	---NA---					0.307	3.25733	0.017

[truncated: 6 more sheets: D0b up, D0b down, D1-2 up, D1-2 down, D3A up, D3A down]
